# Supplementary material for: Genome-Wide Comprehensive Analysis of the GASA Gene Family in Populus
Source: MDPI journal article supplement (doi:10.3390/ijms222212336), 2021-11-15
Supplement: s1 [file s1]

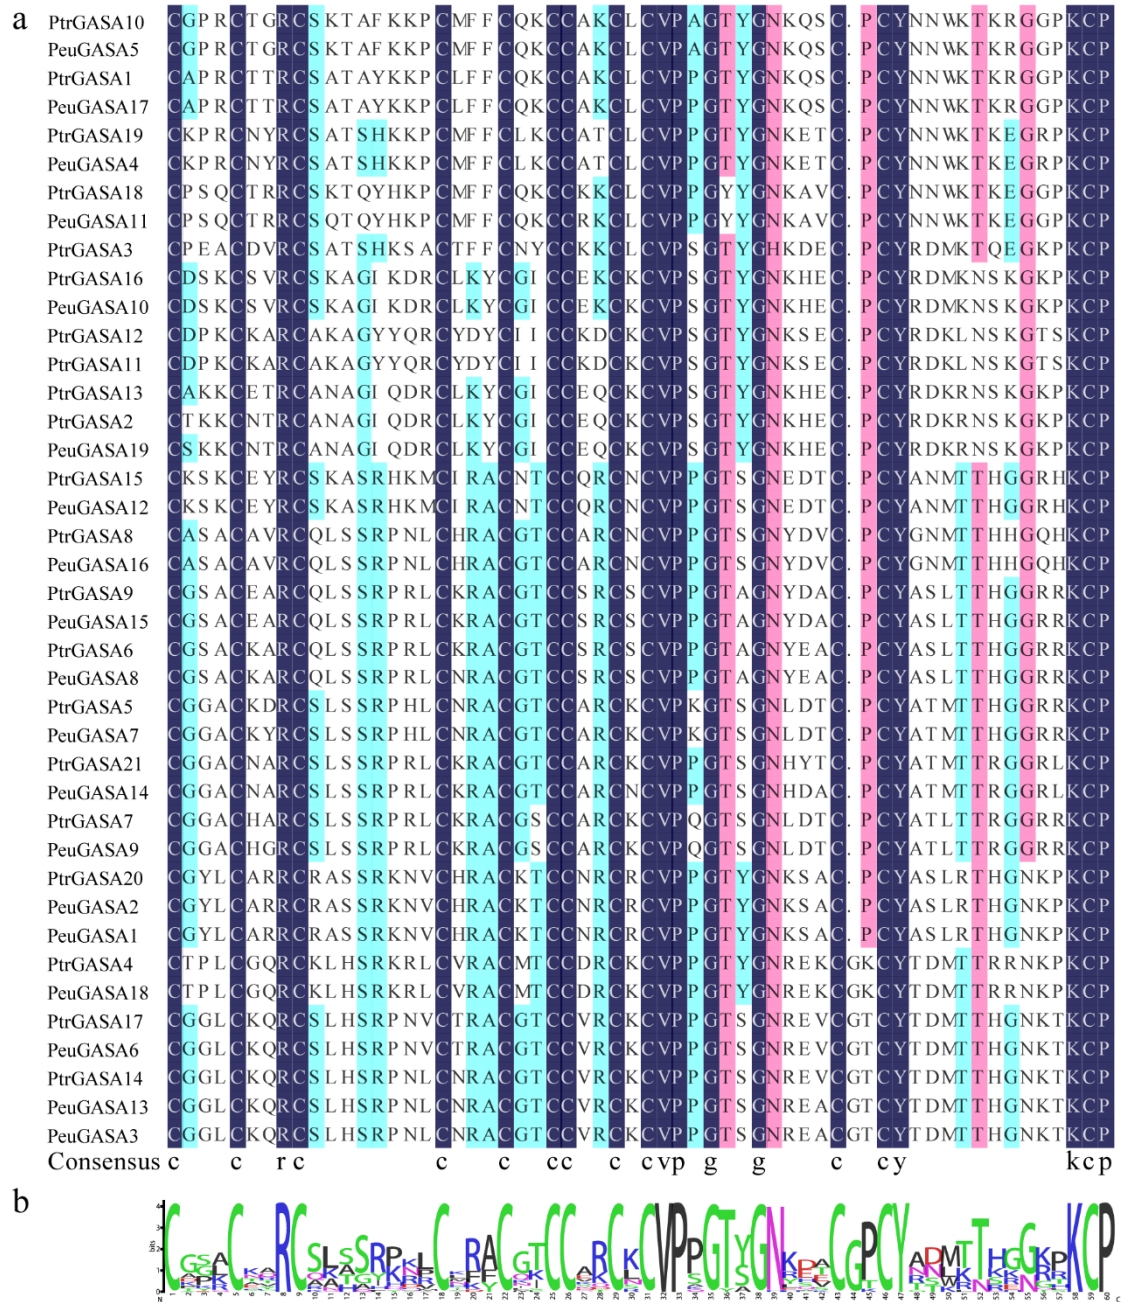

**Figure S1.** Multiple alignment of GASA gene family. (a) Multiple alignment of the conserved GASA domains in *P. euphratica* and *P. trichocarpa*; (b) Sequence logo of the conserved GASA domains *P. euphratica* and *P. trichocarpa*. Each stack represented the amino acids in their corresponding position.

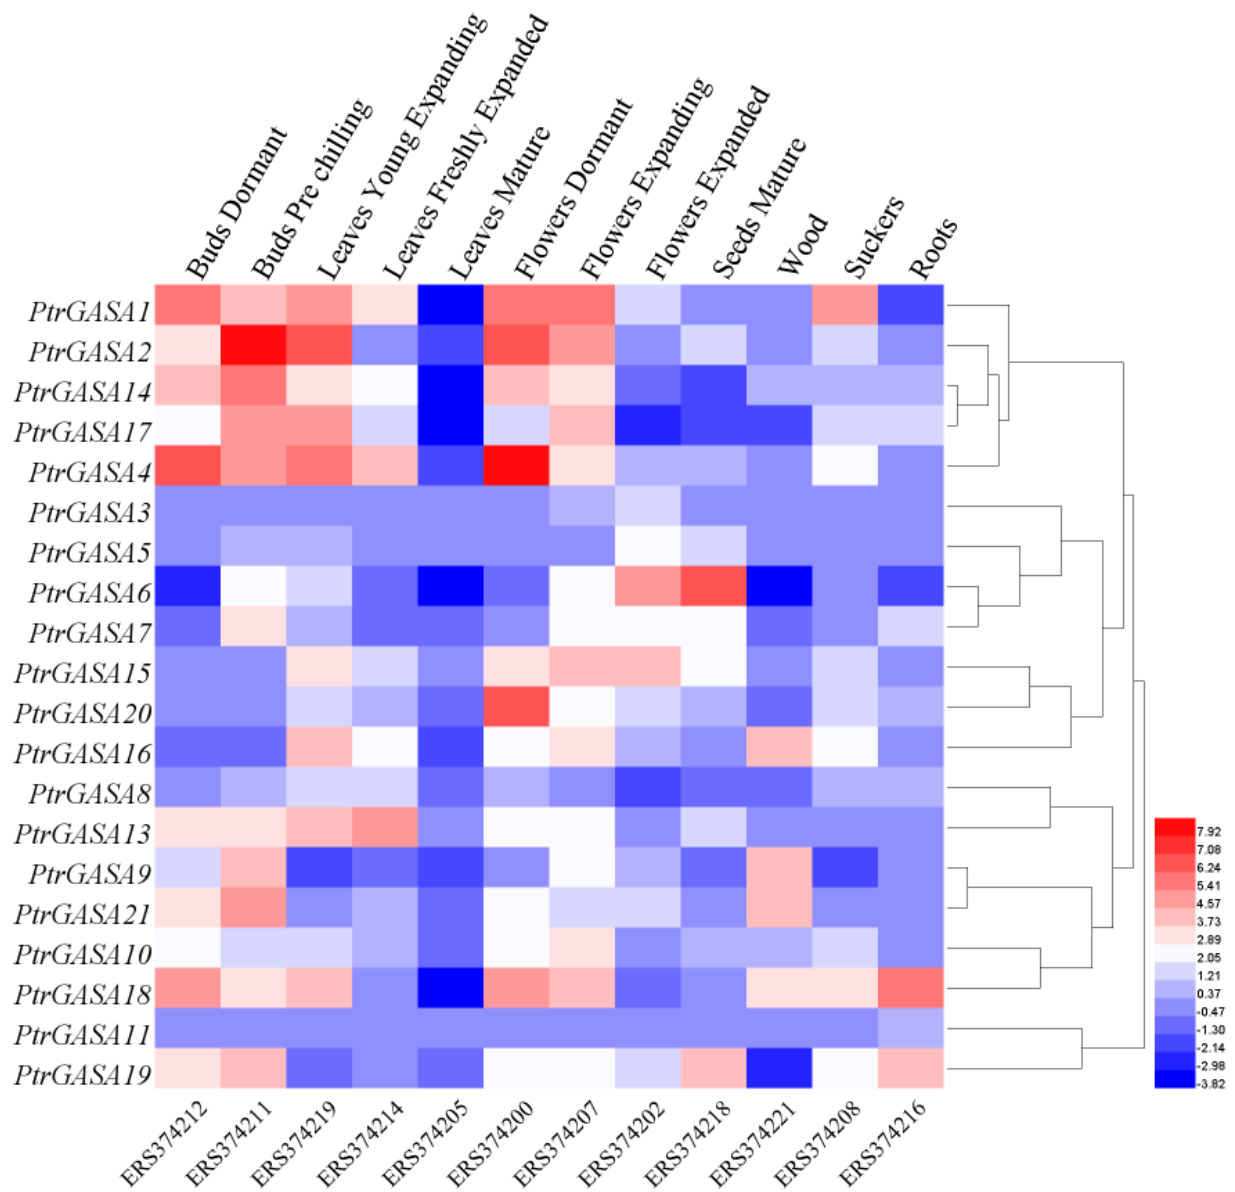

**Figure S2.** The *PtrGASAs* expression profiles in different tissues. Relative expression profiles are based the online PlantGenIE database.

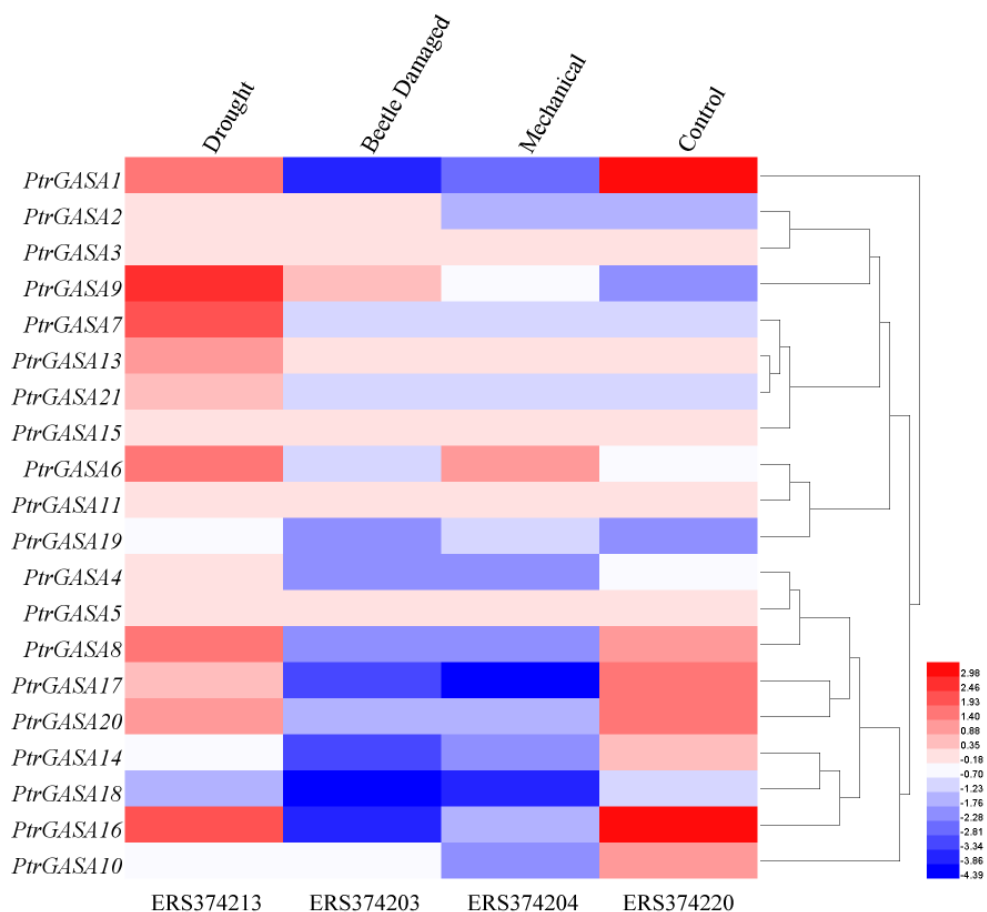

**Figure S3.** The *PtrGASAs* expression profiles respond to stresses. Relative expression profiles are based on the online PlantGenIE database.

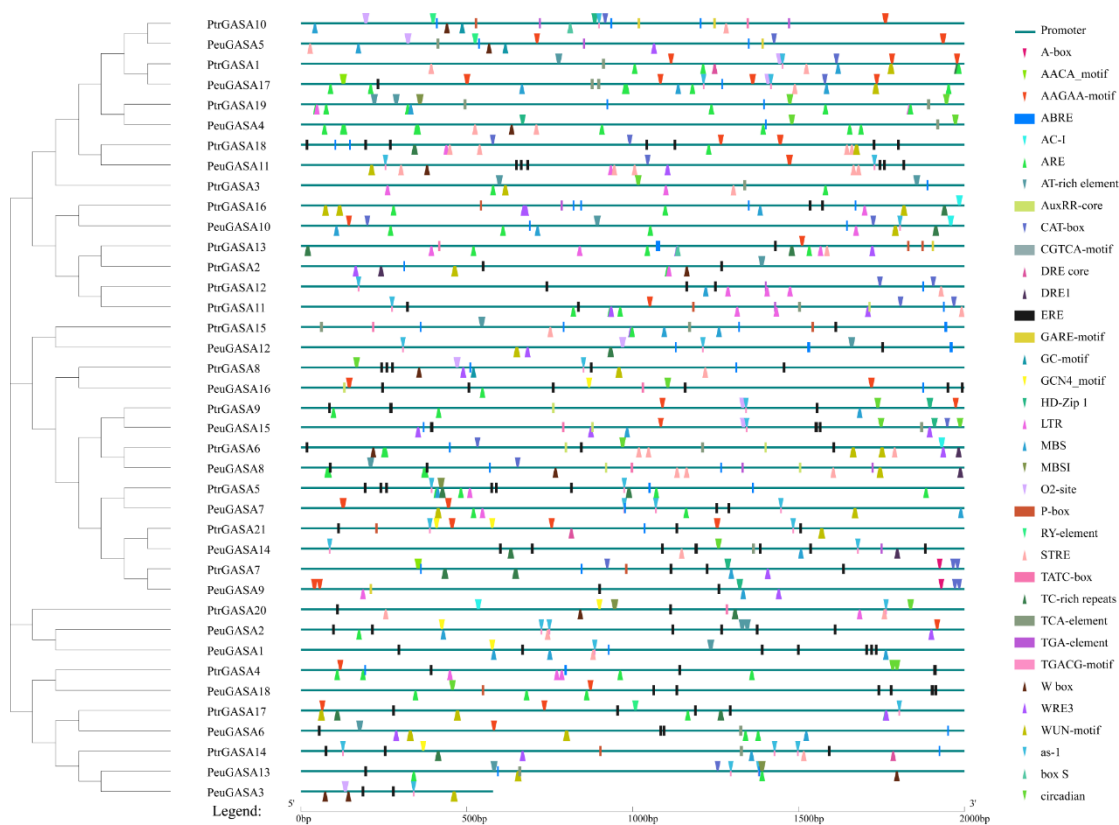

**Figure S4.** The position of the *cis*-acting elements on the promoter region of *GASAs*.

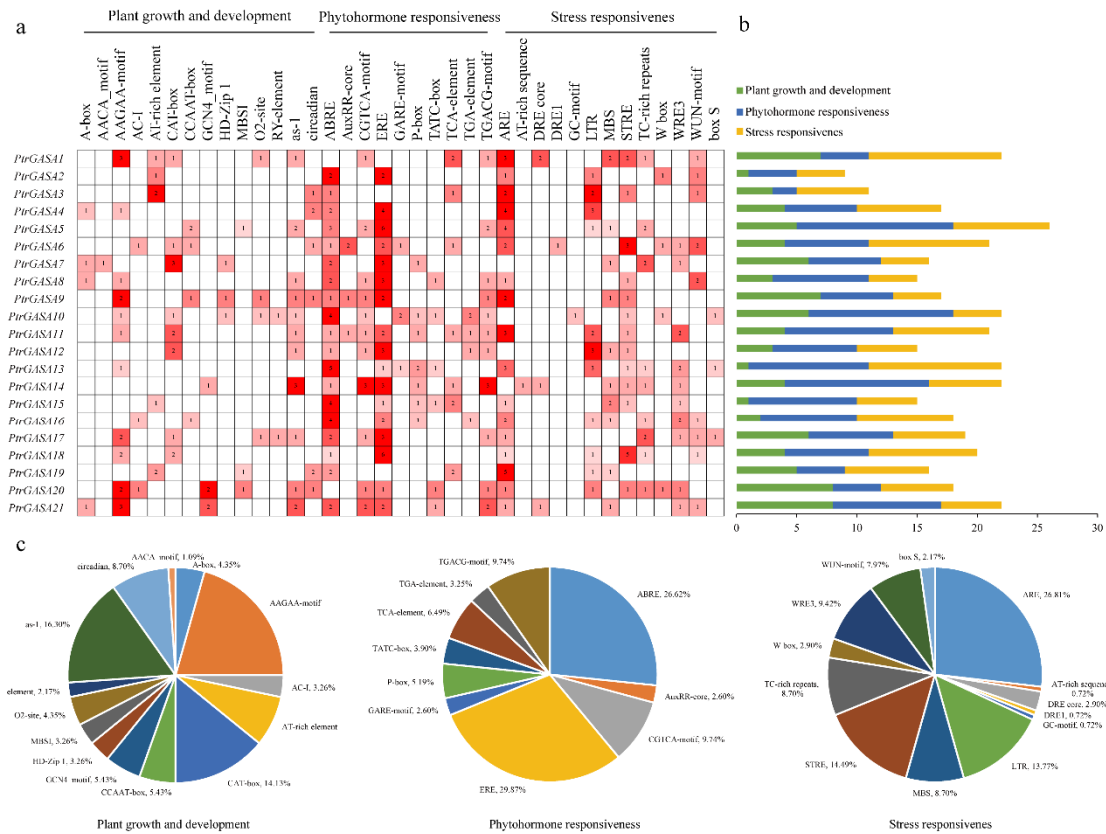

**Figure S5.** The *cis*-acting elements of *PtrGASA* genes. (a) Numbers and gradient red colors indicate the number of *cis*-acting elements; (b) Color-coded histograms indicate the number of *cis*-acting elements of genes in each category; (c) Pie charts show the proportion of different *cis*-acting elements in each category.

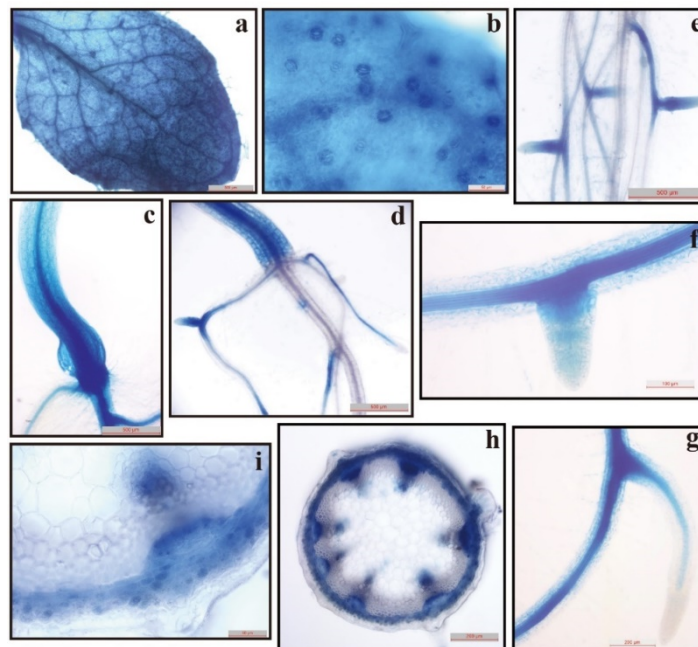

**Figure S6.** Transgenic *Arabidopsis* tissue under a microscope. (a) Leaf; (b) stoma; (c-g) hypocotyls and roots; (h,i) Stem crosscutting.

**Table S1.** The position of *GASA* gene family in *Populus*.

| Gene           | Gene Name        | Position                                      |
|----------------|------------------|-----------------------------------------------|
| LOC105108948   | <i>PeuGASA1</i>  | NW_011500085.1 (253260..255106, complement)   |
| LOC105118698   | <i>PeuGASA2</i>  | NW_011501980.1 (1939..3437, complement)       |
| LOC105120240   | <i>PeuGASA3</i>  | NW_011505596.1 (579..1520)                    |
| LOC105123460   | <i>PeuGASA4</i>  | NW_011499856.1 (2422403..2423496, complement) |
| LOC105127637   | <i>PeuGASA5</i>  | NW_011499872.1 (1730061..1731124, complement) |
| LOC105128593   | <i>PeuGASA6</i>  | NW_011499877.1 (999727..1000813,complement)   |
| LOC105128863   | <i>PeuGASA7</i>  | NW_011499878.1 (1475944..1477033, complement) |
| LOC105128865   | <i>PeuGASA8</i>  | NW_011499878.1 (1472235..1473361, complement) |
| LOC105128866   | <i>PeuGASA9</i>  | NW_011499878.1 (1469630..1470495, complement) |
| LOC105128880   | <i>PeuGASA10</i> | NW_011499846.1 (516539..517398)               |
| LOC105133442   | <i>PeuGASA11</i> | NW_011499907.1 (13672..14941)                 |
| LOC105135117   | <i>PeuGASA12</i> | NW_011499921.1 (212676..214532, complement)   |
| LOC105139569   | <i>PeuGASA13</i> | NW_011499976.1 (560472..561432, complement)   |
| LOC105140101   | <i>PeuGASA14</i> | NW_011499986.1 (190386..191299)               |
| LOC105140102   | <i>PeuGASA15</i> | NW_011499986.1 (204050..205174)               |
| LOC105140103   | <i>PeuGASA16</i> | NW_011499986.1 (208383..209439)               |
| LOC105140300   | <i>PeuGASA17</i> | NW_011499990.1 (62980..63949, complement)     |
| LOC105141680   | <i>PeuGASA18</i> | NW_011500016.1 (91069..92453, complement)     |
| GWHGAAYU001570 | <i>PeuGASA19</i> | GWHAAAYU00000002 (26615279..26616111)         |

| Gene Locus       | Gene Name        | Position                         | Homologous Gene    |
|------------------|------------------|----------------------------------|--------------------|
| Potri.001G254100 | <i>PtrGASA1</i>  | Chr01:26388610..26389799 reverse | <i>PeuGASA17</i>   |
| Potri.001G297700 | <i>PtrGASA2</i>  | Chr01:30205607..30206690 forward | <i>PeuGASA19</i>   |
| Potri.001G315500 | <i>PtrGASA3</i>  | Chr01:32117807..32119314 reverse | No                 |
| Potri.001G350600 | <i>PtrGASA4</i>  | Chr01:35731577..35732904 forward | <i>PeuGASA18</i>   |
| Potri.002G022500 | <i>PtrGASA5</i>  | Chr02:1361599..1362424 forward   | <i>PeuGASA7</i>    |
| Potri.002G022600 | <i>PtrGASA6</i>  | Chr02:1364982..1366298 forward   | <i>PeuGASA8</i>    |
| Potri.002G022700 | <i>PtrGASA7</i>  | Chr02:1368371..1369242 forward   | <i>PeuGASA9</i>    |
| Potri.005G239000 | <i>PtrGASA8</i>  | Chr05:24568559..24569894 reverse | <i>PeuGASA16</i>   |
| Potri.005G239100 | <i>PtrGASA9</i>  | Chr05:24571982..24573134 reverse | <i>PeuGASA15</i>   |
| Potri.006G044400 | <i>PtrGASA10</i> | Chr06:3162131..3163068 reverse   | <i>PeuGASA5</i>    |
| Potri.007G051300 | <i>PtrGASA11</i> | Chr07:5014100..5015000 reverse   | No                 |
| Potri.007G051400 | <i>PtrGASA12</i> | Chr07:5029280..5029709 reverse   | No                 |
| Potri.009G092600 | <i>PtrGASA13</i> | Chr09:8437317..8438127 forward   | No                 |
| Potri.012G076700 | <i>PtrGASA14</i> | Chr12:10207178..10208272 forward | <i>PeuGASA3/13</i> |
| Potri.013G113400 | <i>PtrGASA15</i> | Chr13:12673726..12675596 reverse | <i>PeuGASA12</i>   |
| Potri.014G020100 | <i>PtrGASA16</i> | Chr14:1815675..1816439 forward   | <i>PeuGASA10</i>   |
| Potri.015G071500 | <i>PtrGASA17</i> | Chr15:9609662..9611128 forward   | <i>PeuGASA6</i>    |
| Potri.017G083000 | <i>PtrGASA18</i> | Chr17:9992148..9993493 forward   | <i>PeuGASA11</i>   |
| Potri.017G124200 | <i>PtrGASA19</i> | Chr17:13635455..13636699 reverse | <i>PeuGASA4</i>    |
| Potri.019G083900 | <i>PtrGASA20</i> | Chr19:11678588..11680344 forward | <i>PeuGASA1/2</i>  |
| Potri.T155100    | <i>PtrGASA21</i> | scaffold_621:5902..7033 reverse  | <i>PeuGASA14</i>   |

**Table S2.** Physicochemical properties and subcellular localization prediction of GASAs in *Populus*.

| Gene Name        | Formula                                                                               | Molecular Weight | Theoretical pI | Instability Index (II) | Aliphatic Index | GRAVY  | Localization Predicted                                                                      |
|------------------|---------------------------------------------------------------------------------------|------------------|----------------|------------------------|-----------------|--------|---------------------------------------------------------------------------------------------|
| <i>PeuGASA1</i>  | C <sub>521</sub> H <sub>850</sub> N <sub>152</sub> O <sub>147</sub> S <sub>14</sub>   | 12,184.32        | 9.47           | 54.87                  | 71.91           | -0.224 | extr: 13, vacu: 1                                                                           |
| <i>PeuGASA2</i>  | C <sub>521</sub> H <sub>850</sub> N <sub>152</sub> O <sub>147</sub> S <sub>14</sub>   | 12,184.32        | 9.47           | 54.87                  | 71.91           | -0.224 | extr: 13, vacu: 1                                                                           |
| <i>PeuGASA3</i>  | C <sub>494</sub> H <sub>830</sub> N <sub>156</sub> O <sub>150</sub> S <sub>17</sub>   | 11,900           | 8.88           | 40.03                  | 75.96           | -0.073 | extr: 11, vacu: 3<br>chlo: 6, extr: 5,<br>cyto: 1, mito: 1,<br>E.R.: 1                      |
| <i>PeuGASA4</i>  | C <sub>461</sub> H <sub>746</sub> N <sub>130</sub> O <sub>127</sub> S <sub>14</sub>   | 10,590.63        | 9.2            | 40.4                   | 71.89           | -0.109 | extr: 9, vacu: 3,<br>chlo: 1, golg: 1                                                       |
| <i>PeuGASA5</i>  | C <sub>552</sub> H <sub>890</sub> N <sub>158</sub> O <sub>159</sub> S <sub>14</sub>   | 12,732.94        | 9.36           | 56.2                   | 61.38           | -0.397 | extr: 8, vacu: 6<br>cyto: 4, extr: 3,<br>nucl: 2, vacu: 2,<br>chlo: 1, mito: 1,<br>E.R.: 1  |
| <i>PeuGASA6</i>  | C <sub>518</sub> H <sub>857</sub> N <sub>159</sub> O <sub>151</sub> S <sub>17</sub>   | 12,273.5         | 8.88           | 30.55                  | 80.09           | 0.134  | extr: 12, mito: 1,<br>vacu: 1                                                               |
| <i>PeuGASA7</i>  | C <sub>525</sub> H <sub>884</sub> N <sub>158</sub> O <sub>161</sub> S <sub>15</sub>   | 12,466.66        | 9.2            | 41.33                  | 81.86           | 0.074  | extr: 12, chlo: 1,<br>vacu: 1                                                               |
| <i>PeuGASA8</i>  | C <sub>448</sub> H <sub>735</sub> N <sub>139</sub> O <sub>134</sub> S <sub>14</sub>   | 10,661.45        | 9.04           | 53.61                  | 69.12           | 0.012  | extr: 10, vacu: 2,<br>golg: 2                                                               |
| <i>PeuGASA9</i>  | C <sub>440</sub> H <sub>745</sub> N <sub>141</sub> O <sub>135</sub> S <sub>13</sub>   | 10,587.4         | 9.16           | 43                     | 84.16           | 0.023  | extr: 7, vacu: 5,<br>chlo: 1, cyto: 1                                                       |
| <i>PeuGASA10</i> | C <sub>417</sub> H <sub>671</sub> N <sub>113</sub> O <sub>117</sub> S <sub>15</sub>   | 9620.5           | 9.01           | 25.79                  | 60.91           | 0.03   | extr: 12, cyto: 1,<br>vacu: 1                                                               |
| <i>PeuGASA11</i> | C <sub>521</sub> H <sub>818</sub> N <sub>152</sub> O <sub>135</sub> S <sub>15</sub>   | 11,852.06        | 9.59           | 43.65                  | 55.19           | -0.286 | extr: 11, vacu: 3<br>extr: 6, chlo: 3,<br>vacu: 3, cyto: 1,<br>E.R.: 1                      |
| <i>PeuGASA12</i> | C <sub>417</sub> H <sub>681</sub> N <sub>127</sub> O <sub>126</sub> S <sub>17</sub>   | 10,034.79        | 8.6            | 53.7                   | 63.3            | -0.127 | extr: 12, vacu: 2                                                                           |
| <i>PeuGASA13</i> | C <sub>494</sub> H <sub>830</sub> N <sub>156</sub> O <sub>150</sub> S <sub>17</sub>   | 11,900           | 8.88           | 40.03                  | 75.96           | -0.073 | extr: 12, cyto: 1,<br>vacu: 1                                                               |
| <i>PeuGASA14</i> | C <sub>455</sub> H <sub>766</sub> N <sub>142</sub> O <sub>137</sub> S <sub>14</sub>   | 10,866.8         | 9.16           | 41.78                  | 82.43           | 0.122  | extr: 9, vacu: 3,<br>chlo: 1, golg: 1                                                       |
| <i>PeuGASA15</i> | C <sub>444</sub> H <sub>737</sub> N <sub>135</sub> O <sub>140</sub> S <sub>15</sub>   | 10,687.4         | 8.61           | 59.73                  | 73.82           | 0.092  | extr: 12, vacu: 1,<br>golg: 1<br>chlo: 4, extr:                                             |
| <i>PeuGASA16</i> | C <sub>439</sub> H <sub>714</sub> N <sub>130</sub> O <sub>129</sub> S <sub>15</sub>   | 10,358.19        | 8              | 37.72                  | 88.57           | 0.356  | 4,vacu: 3, cyto: 2,<br>nucl: 1                                                              |
| <i>PeuGASA17</i> | C <sub>530</sub> H <sub>857</sub> N <sub>155</sub> O <sub>149</sub> S <sub>15</sub>   | 12,265.48        | 9.48           | 49.68                  | 61.42           | -0.262 | extr: 9, chlo: 3,<br>vacu: 2                                                                |
| <i>PeuGASA18</i> | C <sub>1063</sub> H <sub>1704</sub> N <sub>280</sub> O <sub>284</sub> S <sub>19</sub> | 23,560.07        | 9.76           | 81.44                  | 52.16           | -0.441 | chlo: 4, extr: 3,<br>vacu: 3, cyto: 2,<br>nucl: 1, plas: 1                                  |
| <i>PeuGASA19</i> | C <sub>421</sub> H <sub>677</sub> N <sub>119</sub> O <sub>119</sub> S <sub>15</sub>   | 9790.63          | 9.12           | 33.52                  | 56.59           | -0.205 | extr: 13, vacu: 1<br>chlo: 6, nucl: 2,<br>plas: 2, cyto: 1,<br>mito: 1, vacu: 1,<br>E.R.: 1 |
| <i>PtrGASA1</i>  | C <sub>554</sub> H <sub>896</sub> N <sub>162</sub> O <sub>155</sub> S <sub>15</sub>   | 12,787.1         | 9.54           | 41.77                  | 64.27           | -0.223 | extr: 12, mito: 1,<br>E.R.: 1                                                               |
| <i>PtrGASA2</i>  | C <sub>422</sub> H <sub>679</sub> N <sub>119</sub> O <sub>119</sub> S <sub>15</sub>   | 9804.66          | 9.12           | 37.23                  | 56.59           | -0.203 | extr: 13, vacu: 1<br>chlo: 6, nucl: 2,<br>plas: 2, cyto: 1,<br>mito: 1, vacu: 1,<br>E.R.: 1 |
| <i>PtrGASA3</i>  | C <sub>441</sub> H <sub>703</sub> N <sub>119</sub> O <sub>136</sub> S <sub>15</sub>   | 10,329.05        | 7.96           | 52.4                   | 61.04           | -0.014 | extr: 12, mito: 1,<br>E.R.: 1                                                               |
| <i>PtrGASA4</i>  | C <sub>911</sub> H <sub>1469</sub> N <sub>247</sub> O <sub>247</sub> S <sub>19</sub>  | 20,443.33        | 9.73           | 71.58                  | 49.95           | -0.442 | extr: 13, vacu: 1<br>chlo: 6, nucl: 2,<br>plas: 2, cyto: 1,<br>mito: 1, vacu: 1,<br>E.R.: 1 |
| <i>PtrGASA5</i>  | C <sub>518</sub> H <sub>871</sub> N <sub>157</sub> O <sub>161</sub> S <sub>15</sub>   | 12,355.47        | 9.11           | 44.96                  | 76.95           | -0.015 | extr: 12, mito: 1,<br>E.R.: 1                                                               |
| <i>PtrGASA6</i>  | C <sub>459</sub> H <sub>756</sub> N <sub>140</sub> O <sub>136</sub> S <sub>14</sub>   | 10,860.75        | 9.03           | 55.53                  | 73.11           | 0.042  | extr: 12, mito: 1,<br>E.R.: 1                                                               |

|                  |                                                                                     |           |      |       |       |        |                                             |
|------------------|-------------------------------------------------------------------------------------|-----------|------|-------|-------|--------|---------------------------------------------|
| <i>PtrGASA7</i>  | C <sub>440</sub> H <sub>744</sub> N <sub>142</sub> O <sub>135</sub> S <sub>13</sub> | 10,600.4  | 9.16 | 48.37 | 83.17 | 0.026  | vacu: 1                                     |
| <i>PtrGASA8</i>  | C <sub>437</sub> H <sub>706</sub> N <sub>128</sub> O <sub>131</sub> S <sub>15</sub> | 10,330.09 | 8.00 | 36.62 | 80.61 | 0.317  | extr: 13, vacu: 1                           |
| <i>PtrGASA9</i>  | C <sub>463</sub> H <sub>754</sub> N <sub>138</sub> O <sub>139</sub> S <sub>14</sub> | 10,926.76 | 8.66 | 55.04 | 75.92 | 0.147  | extr: 12, cyto: 1, vacu: 1                  |
| <i>PtrGASA10</i> | C <sub>551</sub> H <sub>886</sub> N <sub>158</sub> O <sub>159</sub> S <sub>14</sub> | 12,716.9  | 9.36 | 57.86 | 58.02 | -0.443 | extr: 12, mito: 1, vacu: 1                  |
| <i>PtrGASA11</i> | C <sub>493</sub> H <sub>780</sub> N <sub>130</sub> O <sub>137</sub> S <sub>14</sub> | 11,169.25 | 9.05 | 47.3  | 67.94 | -0.015 | extr: 8, vacu: 4, golg: 2                   |
| <i>PtrGASA12</i> | C <sub>493</sub> H <sub>780</sub> N <sub>130</sub> O <sub>137</sub> S <sub>14</sub> | 11,169.25 | 9.05 | 47.3  | 67.94 | -0.015 | extr: 7, chlo: 4, vacu: 3                   |
| <i>PtrGASA13</i> | C <sub>429</sub> H <sub>692</sub> N <sub>120</sub> O <sub>121</sub> S <sub>15</sub> | 9947.85   | 9.11 | 34.21 | 55.96 | -0.245 | extr: 7, chlo: 4, vacu: 3                   |
| <i>PtrGASA14</i> | C <sub>496</sub> H <sub>832</sub> N <sub>154</sub> O <sub>150</sub> S <sub>18</sub> | 11,930.08 | 8.75 | 36.72 | 77.71 | -0.012 | extr: 9, cyto: 3, chlo: 1, E.R.: 1          |
| <i>PtrGASA15</i> | C <sub>415</sub> H <sub>689</sub> N <sub>131</sub> O <sub>124</sub> S <sub>17</sub> | 10,042.86 | 8.97 | 49.23 | 60.11 | -0.221 | extr: 10, vacu: 3, chlo: 1                  |
| <i>PtrGASA16</i> | C <sub>417</sub> H <sub>671</sub> N <sub>113</sub> O <sub>117</sub> S <sub>16</sub> | 9652.56   | 9.01 | 27.19 | 57.61 | 0.003  | extr: 12, cyto: 1, vacu: 1                  |
| <i>PtrGASA17</i> | C <sub>490</sub> H <sub>822</sub> N <sub>154</sub> O <sub>147</sub> S <sub>17</sub> | 11,767.88 | 8.88 | 35.07 | 79.45 | 0.081  | extr: 11, golg: 2, vacu: 1                  |
| <i>PtrGASA18</i> | C <sub>524</sub> H <sub>822</sub> N <sub>150</sub> O <sub>137</sub> S <sub>15</sub> | 11,896.11 | 9.54 | 42.59 | 54.67 | -0.305 | extr: 11, vacu: 3                           |
| <i>PtrGASA19</i> | C <sub>450</sub> H <sub>727</sub> N <sub>129</sub> O <sub>125</sub> S <sub>15</sub> | 10,425.41 | 9.14 | 42.88 | 68.17 | -0.13  | extr: 8, vacu: 4, chlo: 1, cyto: 1          |
| <i>PtrGASA20</i> | C <sub>521</sub> H <sub>850</sub> N <sub>162</sub> O <sub>147</sub> S <sub>14</sub> | 12,184.32 | 9.47 | 54.87 | 71.91 | -0.244 | chlo: 6, extr: 5, cyto: 1, mito: 1, E.R.: 1 |
| <i>PtrGASA21</i> | C <sub>463</sub> H <sub>776</sub> N <sub>142</sub> O <sub>134</sub> S <sub>14</sub> | 10,924.97 | 9.36 | 45.95 | 82.43 | 0.131  | extr: 13, vacu: 1                           |
|                  |                                                                                     |           |      |       |       |        | extr: 6, chlo: 3, vacu: 3, cyto: 1, E.R.: 1 |

**Table S3.** Subcellular localization and prediction of potential cleavage sites of GASAs in *Populus*.

| Gene Name        | Len | cTP   | mTP   | SP    | other | Loc | RC | TPle |
|------------------|-----|-------|-------|-------|-------|-----|----|------|
| <i>PeuGASA1</i>  | 110 | 0.037 | 0.014 | 0.973 | 0.025 | S   | 1  | 20   |
| <i>PeuGASA2</i>  | 110 | 0.037 | 0.014 | 0.973 | 0.025 | S   | 1  | 20   |
| <i>PeuGASA3</i>  | 109 | 0.075 | 0.03  | 0.793 | 0.073 | S   | 2  | 21   |
| <i>PeuGASA4</i>  | 95  | 0.035 | 0.028 | 0.971 | 0.005 | S   | 1  | 24   |
| <i>PeuGASA5</i>  | 116 | 0.014 | 0.03  | 0.946 | 0.015 | S   | 1  | 25   |
| <i>PeuGASA6</i>  | 113 | 0.01  | 0.038 | 0.946 | 0.044 | S   | 1  | 21   |
| <i>PeuGASA7</i>  | 118 | 0.005 | 0.082 | 0.375 | 0.678 | —   | 4  | -    |
| <i>PeuGASA8</i>  | 102 | 0.111 | 0.003 | 0.937 | 0.008 | S   | 1  | 24   |
| <i>PeuGASA9</i>  | 101 | 0.084 | 0.004 | 0.948 | 0.012 | S   | 1  | 23   |
| <i>PeuGASA10</i> | 88  | 0.011 | 0.015 | 0.995 | 0.024 | S   | 1  | 25   |
| <i>PeuGASA11</i> | 106 | 0.092 | 0.035 | 0.501 | 0.017 | S   | 2  | 24   |
| <i>PeuGASA12</i> | 91  | 0.015 | 0.004 | 0.982 | 0.052 | S   | 1  | 28   |
| <i>PeuGASA13</i> | 109 | 0.075 | 0.03  | 0.793 | 0.073 | S   | 2  | 21   |
| <i>PeuGASA14</i> | 103 | 0.039 | 0.006 | 0.96  | 0.017 | S   | 1  | 23   |
| <i>PeuGASA15</i> | 102 | 0.076 | 0.003 | 0.968 | 0.015 | S   | 1  | 24   |
| <i>PeuGASA16</i> | 98  | 0.042 | 0.011 | 0.95  | 0.022 | S   | 1  | 22   |
| <i>PeuGASA17</i> | 113 | 0.02  | 0.066 | 0.844 | 0.014 | S   | 2  | 24   |
| <i>PeuGASA18</i> | 222 | 0.017 | 0.017 | 0.723 | 0.114 | S   | 2  | 20   |
| <i>PeuGASA19</i> | 88  | 0.09  | 0.051 | 0.948 | 0.017 | S   | 1  | 25   |

|                  |     |       |       |       |       |   |   |    |
|------------------|-----|-------|-------|-------|-------|---|---|----|
| <i>PtrGASA1</i>  | 117 | 0.031 | 0.025 | 0.903 | 0.018 | S | 1 | 24 |
| <i>PtrGASA2</i>  | 88  | 0.073 | 0.045 | 0.957 | 0.02  | S | 1 | 25 |
| <i>PtrGASA3</i>  | 96  | 0.018 | 0.017 | 0.987 | 0.021 | S | 1 | 27 |
| <i>PtrGASA4</i>  | 191 | 0.017 | 0.018 | 0.763 | 0.097 | S | 2 | 20 |
| <i>PtrGASA5</i>  | 118 | 0.011 | 0.059 | 0.293 | 0.64  | — | 4 | -  |
| <i>PtrGASA6</i>  | 103 | 0.056 | 0.002 | 0.963 | 0.017 | S | 1 | 24 |
| <i>PtrGASA7</i>  | 101 | 0.073 | 0.005 | 0.956 | 0.014 | S | 1 | 23 |
| <i>PtrGASA8</i>  | 98  | 0.052 | 0.011 | 0.95  | 0.019 | S | 1 | 22 |
| <i>PtrGASA9</i>  | 103 | 0.032 | 0.003 | 0.979 | 0.018 | S | 1 | 24 |
| <i>PtrGASA10</i> | 116 | 0.014 | 0.028 | 0.95  | 0.015 | S | 1 | 25 |
| <i>PtrGASA11</i> | 102 | 0.055 | 0.098 | 0.946 | 0.003 | S | 1 | 25 |
| <i>PtrGASA12</i> | 102 | 0.055 | 0.098 | 0.946 | 0.003 | S | 1 | 25 |
| <i>PtrGASA13</i> | 89  | 0.041 | 0.057 | 0.972 | 0.013 | S | 1 | 26 |
| <i>PtrGASA14</i> | 109 | 0.035 | 0.021 | 0.913 | 0.063 | S | 1 | 21 |
| <i>PtrGASA15</i> | 91  | 0.11  | 0.005 | 0.855 | 0.049 | S | 2 | 28 |
| <i>PtrGASA16</i> | 88  | 0.011 | 0.016 | 0.995 | 0.025 | S | 1 | 25 |
| <i>PtrGASA17</i> | 109 | 0.025 | 0.017 | 0.94  | 0.044 | S | 1 | 21 |
| <i>PtrGASA18</i> | 107 | 0.075 | 0.022 | 0.751 | 0.013 | S | 2 | 24 |
| <i>PtrGASA19</i> | 97  | 0.04  | 0.024 | 0.971 | 0.008 | S | 1 | 29 |
| <i>PtrGASA20</i> | 110 | 0.037 | 0.014 | 0.973 | 0.025 | S | 1 | 25 |
| <i>PtrGASA21</i> | 103 | 0.044 | 0.005 | 0.97  | 0.015 | S | 1 | 23 |

**Table S4.** The gene-specific primers for qRT-PCR.

| Gene               | Forward Primer                  | Reverse Primer                |
|--------------------|---------------------------------|-------------------------------|
| <i>PeuUBQ</i>      | 5'-AGACCTACACCAAGCCCAAGAAGAT-3' | 5'-CCAGCACC GCACTCAGCATTAG-3' |
| <i>PeuGASA1/2</i>  | 5'-TAGCAACGCTGCAAATTCTCC-3'     | 5'-AGGCTTGCATAACATGGGCA-3'    |
| <i>PeuGASA3/13</i> | 5'-ATGGCAGTACGTTTCGTTCTT-3'     | 5'-ACGCACTTGCATCTCACACA-3'    |
| <i>PeuGASA4</i>    | 5'-ATTCCCTCTTGCTGGTCCTT-3'      | 5'-CCATAAGTCCCAGGAGGAACAC-3'  |
| <i>PeuGASA5</i>    | 5'-ACATCACAGAGGCTCCAACC-3'      | 5'-TCCCATAAGTTCCAGCAGGC-3'    |
| <i>PeuGASA6</i>    | 5'-CAGCTTGTTGTGAGAGGTGG-3'      | 5'-CCATGGGTGGTCATGTCAGTA-3'   |
| <i>PeuGASA7</i>    | 5'-CGCTTCGCTTGTCGTATCTC-3'      | 5'-TATCTAGGTTGCCGGAAGTGC-3'   |
| <i>PeuGASA8</i>    | 5'-GTGAACTCGAATCTTGCTGCG-3'     | 5'-ATGGGTAGTCAAGCTGGCG-3'     |
| <i>PeuGASA9</i>    | 5'-TGTGCTCCATCTTGCCGAAG-3'      | 5'-CACGAGTAGTCAAGGTGGCA-3'    |
| <i>PeuGASA10</i>   | 5'-CACGAGTGCCCTTGCTACAG-3'      | 5'-CGGTGGCAACTACCGGAAT-3'     |
| <i>PeuGASA11</i>   | 5'-TTGCCATTTCATGCTCCAA-3'       | 5'-TGTAAGCAAGGGCACACAGC-3'    |
| <i>PeuGASA12</i>   | 5'-GGTCAGTGCCAAGACAACATT-3'     | 5'-GTTGGCATAGCAAGGACAGGT-3'   |
| <i>PeuGASA14</i>   | 5'-CATCTCTCCTTGCTCCGC-3'        | 5'-CGGTAGTCATGCTGGCATAG-3'    |
| <i>PeuGASA15</i>   | 5'-CTTCTTGTTCTCCAATTGCCG-3'     | 5'-GGCAAGCGTCATAGTTACCG-3'    |
| <i>PeuGASA16</i>   | 5'-GCTGTCCTCCTGTAGGCAT-3'       | 5'-CCATAGCAGGGACACACGTC-3'    |
| <i>PeuGASA17</i>   | 5'-ACAACGACAGGGCAACCAT-3'       | 5'-CAGTTGTTGTAGCAAGGGCA-3'    |
| <i>PeuGASA18</i>   | 5'-GCTGTGTCTTATGCTGGT-3'        | 5'-AGGTGGTGTCTTAAGTGGTGG-3'   |
| <i>PeuGASA19</i>   | 5'-GTTGCTGTGTTCCCTCCTCTT-3'     | 5'-AAGGGCACTCGTGCTTGTTTC-3'   |

**Table S5.** The gene-specific primers of *Peu*GASAs for PCR-amplified.

| <b>Gene Name</b>    | <b>Forward Primer</b>                    | <b>Reverse Primer</b>                      |
|---------------------|------------------------------------------|--------------------------------------------|
| <i>PeuGASA4</i>     | 5'-ATGGCTAGCCTCAGTCGCA-3'                | 5'-CAAGGGCACTTGGGTCTTCC-3'                 |
| <i>PeuGASA5</i>     | 5'-ATGTCGAGGAAGCCAAGCATTA-3'             | 5'-AAGGGCACTTGGGGCCTC-3'                   |
| <i>PeuGASA8</i>     | 5'-AAGGACACTTGCGTCTGCC-3'                | 5'-AAGGACACTTGCGTCTGCC-3'                  |
| <i>PeuGASA10</i>    | 5'-ATGAAGCCTGTTTTTGCAGCTATT-3'           | 5'-AAGGGCACTTCGGTTTGCC-3'                  |
| <i>PeuGASA11</i>    | 5'-ATGGCTAAGTTTGTGCTGTCTTC-3'            | 5'-AAGGGCACTTGGGCCCTC-3'                   |
| <i>PeuGASA15</i>    | 5'-ATGGCTATGATCACCAAGTTGCT-3'            | 5'-AAGGACACTTGCGTCTGCC-3'                  |
| <i>PeuGASA18</i>    | 5'-ATGGCTTTCAAAGCTGTGTGTC-3'             | 5'-AAGGGCACTTGGGCTTGTTG-3'                 |
| <i>PeuGASA17</i>    | 5'-ATGGGCAAATCAAGCATTGCC-3'              | 5'-AAGGGCATTGTTGGGCCCTC-3'                 |
| <i>PeuGASA15Pro</i> | <u>5'-GGATCCACGCGATTGTCTGGTTGGAAG-3'</u> | <u>5'-GAATTCCTGGGATGAACTAGGAAAGGGTC-3'</u> |
